## Resource diversity structures aquatic bacterial communities

2

**Mario E. Muscarella<sup>1,2</sup>, Claudia M. Boot<sup>3,4</sup>, Corey D. Broeckling<sup>5</sup>, Jay T. Lennon<sup>2,\*</sup>**

4 <sup>1</sup>Department of Plant Biology, University of Illinois, Urbana-Champaign 61801, USA

<sup>2</sup>Department of Biology, Indiana University, Bloomington, Indiana 47405, USA

6 <sup>3</sup>Natural Resource Ecology Laboratory, Colorado State University, Fort Collins, Colorado, USA

<sup>4</sup>Department of Chemistry, Colorado State University, Fort Collins, Colorado, USA

8 <sup>5</sup>Proteomics and Metabolomics Facility, Colorado State University, Fort Collins, Colorado, USA

10

12 \* Corresponding author, 1001 East 3rd Street, Bloomington, IN 47405 USA

Tel 812-856-0962, Fax 812-855-6082, Email [lennonj@indiana.edu](mailto:lennonj@indiana.edu)

14

16

Running Title: Resource Diversity Structures Bacterial Communities

18

Key Words: DOM Diversity, Resource Heterogeneity, Bacteria-DOM Interactions, Resource  
20 Specialization, Community Evenness, Microbial Generalists, Ecosystem Metabolomics

22

## ABSTRACT

24 Microbial diversity is strongly affected by the bottom-up effects of resource availability.  
However, because resource pools often exist as heterogeneous mixtures of distinct molecules,  
26 resource heterogeneity may also affect community diversity. To test this hypothesis, we surveyed  
bacterial communities in lakes that varied in resource concentration. In addition, we  
28 characterized resource heterogeneity in these lakes using an ecosystem metabolomics approach.  
Overall, resource concentration and resource heterogeneity affected bacterial resource–diversity  
30 relationships. We found strong relationships between bacterial alpha-diversity (richness and  
evenness) and resource concentration and richness, but richness and evenness responded in  
32 different ways. Likewise, we found associations between the composition of the bacterial  
community and both resource concentration and composition, but the relationship with resource  
34 composition was stronger. Last, in the surveyed communities the presence of resource generalists  
may have reduced the effect of resource heterogeneity on community composition. These results  
36 have implications for understanding the interactions between bacteria and organic matter and  
suggest that changes in organic matter composition may alter the structure and function of  
38 bacterial communities.

40

## INTRODUCTION

Resource availability is a bottom-up control that has strong effects on the diversity of  
42 consumer communities. Theory suggests that resource enrichment promotes diversity and food-  
web complexity (Rosenzweig, 1971; Hairston and Hairston, 1993; Abrams and Roth, 1994; Polis  
44 and Strong, 1996; Worm *et al.*, 2002), and empirical studies have shown that, in the absence of  
top-down control, ecosystems with higher resource concentrations support more diverse and  
46 productive communities (Leibold *et al.*, 1997; Leibold, 1999; Hulot *et al.*, 2000; Waldrop *et al.*,  
2006). However, the relationship between resources and diversity can be complex (Mittelbach *et*  
48 *al.*, 2001; Tilman *et al.*, 1982). For example, while diversity often increases linearly with  
resource concentration (Stevens and Carson, 2002), it can also exhibit more complex, non-linear  
50 relationships where diversity peaks at intermediate concentrations (Leibold, 1999). Such  
responses have been attributed to a range of processes including variation in competitive ability  
52 among consumers (Leibold, 1999), shared limitations across species (Stevens and Carson, 2002),  
and trophic interactions (Holt *et al.*, 1994; Carpenter *et al.*, 2001).

54 Another feature that may influence resource–diversity relationships is the heterogeneity  
of the resource pool. Resources are often considered as homogenous pools, but many resources  
56 exist as heterogeneous mixtures of multiple forms (Ashton *et al.*, 2010; Schoener, 1974; Turner,  
2008). Resource heterogeneity has the potential to promote consumer diversity via niche  
58 partitioning (Schoener, 1974; Finke and Snyder, 2008). For example, plants have been shown to  
partition different forms of nitrogen (e.g., NH<sub>4</sub>, NO<sub>3</sub>, organic N) in ways that may promote  
60 species coexistence (McKane *et al.*, 2002; Schimel and Bennett, 2004; Andersen and Turner,  
2013). Likewise, different phosphorus resources (e.g., phosphate vs. phytic acid) can alter the  
62 diversity and function of aquatic bacterial communities (Muscarella *et al.*, 2014), taxa in

microbial biocrusts have non-overlapping resource preferences (Baran *et al.*, 2015), and  
64 phytoplankton are capable of partitioning the light spectrum in ways that allow for species  
coexistence (Stomp *et al.*, 2004).

66         The effects of resource heterogeneity may depend on the degree to which communities  
are comprised of generalist or specialists. If communities are made up primarily of resource  
68 generalists, then the total concentration of a resource should have a stronger influence on  
diversity because species do not differ in their response to different resources (Stevens and  
70 Carson, 2002). In contrast, if communities are made up of resource specialists, then resource  
heterogeneity may promote consumer diversity by providing unique resource niches for  
72 consumers to partition (Glasser, 1984; Levine and HilleRisLambers, 2009). Together, resource  
heterogeneity and resource acquisition strategy (i.e., generalists versus specialist) may help  
74 resolve unexplained variation in resource–diversity relationships.

For heterotrophic organisms, an important resource used for growth and physiological  
76 maintenance is organic matter. Organic matter is heterogeneous and consists of molecules that  
differ in chemical structure, origin, and age (Stevenson, 1994). In aquatic ecosystems, dissolved  
78 organic matter (DOM) is often classified based on origin (autochthonous vs. allochthonous) and  
bioavailability (labile vs. recalcitrant). DOM can also be characterized based on its optical  
80 properties (Fellman *et al.*, 2009; Weishaar *et al.*, 2003) and functional groups (e.g., humic acids)  
(Croué, 2004). However, these characterizations may not adequately describe DOM composition  
82 because other chemical features, including molecular weight, oxidation state, stoichiometry, and  
chemical structure, can influence the metabolism of organisms that consume DOM, (Cory and  
84 McKnight, 2005; Cherif and Loreau, 2007; Lennon and Pfaff, 2005; Berggren *et al.*, 2010).  
However, recent technological advances have made it possible to more thoroughly characterize

86 DOM diversity at the molecular level (Moran *et al.*, 2016; Petras *et al.*, 2017; Broeckling *et al.*,  
2008). Therefore, there is now the opportunity to understand the linkages between DOM  
88 heterogeneity and consumer diversity and characterize resource-diversity relationships (Töpper  
*et al.*, 2012; Alonso-Sáez and Gasol, 2007; Gómez-Consarnau *et al.*, 2012; Osterholz *et al.*,  
90 2018).

In this study, we measured aquatic microbial communities and DOM chemistry to  
92 understand how resource heterogeneity contributes to resource–diversity relationships. We  
measured bulk resource concentration measurements and used high-resolution mass  
94 spectrometry to quantify resource heterogeneity. We also characterized aquatic bacterial  
community diversity using 16S rRNA sequencing. Furthermore, we used species-resource co-  
96 occurrence to test the hypothesis that communities dominated by specialists would respond  
stronger to resource heterogeneity than to resource availability. Our results support the view that  
98 resource heterogeneity promotes bacterial community diversity, but the contribution of DOM  
resource heterogeneity may be dampened when DOM generalists dominate bacterial  
100 communities.

## 102 **METHODS**

**Study System and Sampling** — The Huron Mountains nature preserve is a 5300 ha tract of  
104 private land in the upper peninsula of Michigan, USA. The area is part of the Superior Bedrock  
Uplands region (Schaeztl *et al.*, 2013). The surrounding forests are primarily old-growth  
106 hemlock-northern hardwoods (Woods, 2000), and the inland water bodies are part of the Pine  
River Watershed, which drains into Lake Superior. Using a van Dorn sampler, we obtained  
108 surface water samples (0.5 m) from 10 lakes in the Huron Mountains during July 2011 (Fig. S1,

Table 1). In addition, we measured dissolved oxygen concentrations, temperature, pH, and  
110 conductivity at the time of sampling using Quanta Hydrolab water quality sonde, and we  
measured chlorophyll *a* concentration in the lab after cold ethanol extraction of 0.7  $\mu\text{m}$ -filtered  
112 (Whatman GF/F) water samples using a Turner Biosystems Fluorometer (Table 1).

114 **Resource Concentrations** — With the water samples, we measured the concentrations of  
dissolved organic carbon (DOC), total nitrogen (TN) and total phosphorus (TP). We measured  
116 DOC concentrations by oxidation and non-dispersive infrared detection on 0.7  $\mu\text{m}$ -filtered  
(Whatman, GF/F) samples using a Shimadzu TOC-V carbon analyzer. We measured TN on  
118 unfiltered samples using a Lachat FIA 8500 auto-analyzer (Hach, Loveland CO) after  
ammonium peroxydisulfate/sulfuric acid digestion (Lachat, 2005). We measured TP on  
120 unfiltered samples spectrophotometrically using the ammonium molybdate method and oxidation  
by persulfate digestion (Wetzel and Likens, 2000).

122  
**Resource Heterogeneity** — To estimate resource heterogeneity, we characterized the  
124 composition of dissolved organic matter (DOM) for each lake using ecosystem metabolomics.  
We extracted DOM from each sample using solid phase extraction (SPE) (Dittmar *et al.*, 2008).  
126 Briefly, we acidified 1 L of 0.7  $\mu\text{m}$ -filtered (Whatman, GF/F) water to pH 3.0 with 4N HCl. We  
then passed the water sample through an SPE cartridge (Discovery-18, Supelco, Bellefonte PA)  
128 at a flow rate  $\leq 5 \text{ mL min}^{-1}$  using vacuum pressure. Columns were pre-conditioned using 6 mL  
100% methanol followed by 6 mL pH 3.0 ultra-pure  $\text{H}_2\text{O}$ . We filtered the sample until no sample  
130 remained or until the cartridge became clogged (recording the final volume filtered) and dried  
the filter with  $\text{N}_2$  gas for 5 minutes. We eluted the DOM from the column using 100 % methanol

132 and evaporated the methanol at 25 °C using vacuum centrifugation. A consistent amount of  
purified DOM was then separated on Waters Acquity ultra-performance liquid chromatography  
134 T3 column (1.8 µM, 1.0 x 100 mm) using water with a 0.1% formic acid-acetonitrile gradient  
and analyzed using negative electrospray ionization with quadrupole time of flight mass  
136 spectrometry (Q-TOF MS; Waters G2 Q-TOF) and indiscriminate tandem MS (idMS/MS) at the  
Colorado State University Proteomics and Metabolomics Facility. Q-TOF MS provides high  
138 resolution, accurate mass quantification and idMS/MS provides high collision energy  
fragmentation without precursor ion selection acquired concurrently with low-collision energy  
140 MS data. For each sample, raw data files were converted to .cdf format, and a matrix of  
molecular features as defined by retention time and ion mass ( $m/z$ ) was generated using the  
142 XCMS package in R (Smith *et al.*, 2016) for feature detection and alignment. Raw peak areas  
were normalized to total ion signal, and the mean area of the chromatographic peak was  
144 calculated from duplicate injections. Features were grouped based on an in-house clustering tool,  
RAMClustR, which groups features into spectra based co-elution and covariance across the full  
146 dataset, whereby spectra are used to determine the identity of observed compounds in the  
experiment (Broeckling *et al.*, 2014). We used field-prepared ultrapure water as controls and  
148 subtracted control peaks from sample peak heights. We multiplied control peaks by 1.1 to  
provide conservative blank subtraction. A subset of the clustered dataset was referenced to the  
150 NISTv14 tandem (MS/MS) library, which contains 193,119 spectra of 43,912 precursor ions  
from 8,531 chemical compounds, and also screened for matches in Metlin for putative compound  
152 identification. Retention time was used as a proxy for polarity, and the heaviest ion ( $m/z$ ) in the  
clustered spectra was used as a proxy for molecular weight. We recognize that the heaviest ion  
154 may not be representative of the molecular weight in all cases due to, for example, the formation

of dimers and potential in-source fragmentation, however, electrospray is the gentlest type of  
156 ionization and is often related to the mass of the analytes. We define “DOM components” as the  
chemical features identified in DOM samples by ecosystem metabolomics.

158

**Microbial Composition** — We used an RNA based approach to characterize bacterial  
160 community composition by sequencing the 16S rRNA gene transcript. We extracted total nucleic  
acids using the MoBio Power Water RNA extraction kit (Carlsbad, CA). Nucleic acid extracts  
162 were cleaned via ethanol precipitation and RNA extracts were treated with DNase I (Invitrogen)  
to degrade residual DNA. We synthesized cDNA via the SuperScript III First Strand Synthesis  
164 Kit using random hexamer primers (Invitrogen). Once cDNA samples were cleaned and  
quantified, we amplified the 16S rRNA gene transcript (cDNA) using barcoded primers (515F  
166 and 806R) designed to work with the Illumina MiSeq platform (Caporaso *et al.*, 2012). We  
purified the sequence libraries using the AMPure XP purification kit, quantified using the  
168 QuantIt PicoGreen kit (Invitrogen), and pooled libraries at equal molar ratios (final  
concentration: 20 ng per). After pooling, we sequenced the libraries on the Illumina MiSeq  
170 platform using 250 x 250 bp paired end reads (Illumina Reagent Kit v2) at the Indiana University  
Center for Genomics and Bioinformatics Sequencing Facility. Paired-end raw 16S rRNA  
172 sequence reads were assembled into contigs and filtered based on quality score, length, and  
ambiguous base calls. After filtering, we aligned our sequences to the Silva Database (version  
174 123). Chimeric sequences were detected and removed using the VSEARCH algorithm (Rognes  
*et al.*, 2016). We then created operational taxonomic units OTUs by first splitting the sequences  
176 based on taxonomic class (using the RDP taxonomy) and the binning sequences in OTUs based



on 97% sequence similarity. All initial sequence processing was completed using the software  
178 package *mothur* (version 1.40.5; Schloss *et al.*, 2009).

180 **Resource Heterogeneity and Community Diversity** — First, we tested the hypothesis that  
resource heterogeneity affects bacterial community alpha diversity. We used linear models to  
182 determine if higher resource concentrations or more types of DOM resources (i.e., resource  
richness) would affect the richness and evenness of bacterial communities. We transformed  
184 (Box-Cox), centered, and scaled (i.e., divided by standard deviation) resource concentration and  
species richness to meet model assumptions of equal variance and normality (Neter *et al.*, 1996).  
186 We subsampled bacterial communities using rarefaction to correct for differences in sample size  
due to sequencing depth (Hughes and Hellmann, 2005; James and Rathbun, 1981). We rarefied  
188 communities and calculated species richness as the number of OTUs observed and species  
evenness using Simpson's evenness (Smith and Wilson, 1996). We used the Box-Cox-  
190 transformed DOC concentration as the measure of resource concentration and we calculated  
resource richness as the number of distinct DOM peaks observed in each sample.

192 Next, we tested the hypothesis that resource heterogeneity affects community beta  
diversity by comparing resource concentrations and DOM composition to bacterial community  
194 composition. We used distance-based redundancy analysis (dbRDA; Legendre and Anderson,  
1999) to test for relationships between: 1) resource concentration and community composition  
196 and 2) resource composition and community composition. dbRDA is a multivariate linear model  
technique that uses quantitative factors explaining differences in multivariate community  
198 composition data. We used the Box-Cox-transformed DOC concentration as the measure of  
resource concentration. To use DOM composition as a predictor in our dbRDA model, we used

200 principal coordinates analysis (PCoA), based on relative abundances and Bray-Curtis  
dissimilarity, to decompose DOM composition into orthogonal linear components (Legendre and  
202 Legendre, 2012). To represent the DOM composition, we used the DOM PCoA axis scores for  
each sample. As the response in the dbRDA model, we relativized OTU abundances and used  
204 Bray-Curtis distances to compare community composition across samples. Significance tests of  
our dbRDA model were conducted based on 10,000 permutations. All calculations were done in  
206 the R statistical environment (R Core Team, 2012) using the ‘vegan’ package (Oksanen *et al.*,  
2013).

208

**Consumer-Resource Specialization** — To test the hypothesis that the response to resource  
210 heterogeneity depends on whether communities were dominated by generalists or specialists, we  
used consumer-resource co-occurrence to define generalists and specialists. We defined resource  
212 generalists and specialists based on co-occurrence analysis, which was performed using  
Spearman’s rank correlations between DOM components and bacterial OTUs. We used the  
214 relative abundances of DOM components and the relative transcript abundances of bacterial  
OTUs. We inferred interactions based on correlations with coefficients  $> |0.7|$  (Williams *et al.*,  
216 2014), and we tested for significance using a permutation test based on randomizations with the  
independent-swap algorithm (Gotelli, 2000). We defined resource generalists as those taxa with  
218 four or more significant negative resource interactions. We used the negative interaction as a  
proxy for potential resource consumption. To understand the spatial extent of individual taxa, we  
220 defined cosmopolitan taxa as those found in  $\geq 90$  % of the sampled lakes and we determined  
how many resource generalists were also cosmopolitan taxa. All calculations were done in the R  
222 statistical environment.

## RESULTS

224 **Resource Composition and Heterogeneity** — The lakes sampled captured a range of bulk  
resource concentrations (Table 1), and many bulk resource concentrations were correlated. For  
226 example, the concentrations of dissolved organic carbon (DOC) and total nitrogen (TN) were  
highly correlated ( $\rho = 0.97, p < 0.001$ , Fig. S2). Using ecosystem metabolomics, we  
228 characterized the dissolved organic matter (DOM) pool and detected 712 compounds across the  
sites. We refer to these molecules as DOM components. Based on the relative abundances of  
230 DOM components, sites were on average 37 % dissimilar in DOM composition. Using principal  
coordinates analysis (PCoA), we could explain 71 % of the variation in DOM composition  
232 across sites using three dimensions (Fig. 1). The variation in DOM composition was significantly  
related to DOC ( $r^2 = 0.68, p = 0.01$ ), TN ( $r^2 = 0.70, p = 0.01$ ), Chl a ( $r^2 = 0.69, p = 0.02$ ), and pH  
234 ( $r^2 = 0.58, p = 0.03$ ), but there were no significant relationships with TP ( $r^2 = 0.27, p = 0.34$ ) or  
surface area ( $r^2 = 0.30, p = 0.26$ ). In addition, we found a negative relationship between the  
236 richness of DOM components and the concentration of DOC ( $p < 0.01$ ). We used DOC to  
represent resource concentration and the DOM PCoA scores to represent DOM composition in  
238 further analyses. We identified influential DOM components as those correlated ( $\rho > |0.70|$ )  
with variation in the DOM PCoA axes (Fig. S3). We identified 172 influential DOM  
240 components.

242 **Community Composition and Resource-Diversity Relationships** — Across the 10 lakes, we  
identified 5,085 bacterial operational taxonomic units (OTUs) based on 16S rRNA transcript  
244 sequencing. When rarified, lakes varied in taxonomic richness and evenness (Fig. 2). Using

Bray-Curtis distances and relative transcript abundances, lakes were on average 62 % dissimilar  
246 to one another based on bacterial community composition.

First, we tested for relationships between resources and bacterial alpha-diversity. We  
248 used linear regression to test for resource-diversity relationships between bacterial community  
diversity (richness and evenness) and both resource concentration and DOM richness. As  
250 predicted, bacterial alpha-diversity was affected by resource concentration (Fig. 2). OTU  
richness was positively related to resource concentration ( $r^2 = 0.66$ ,  $p = 0.008$ ) but  
252 negatively related to DOM richness ( $r^2 = 0.50$ ,  $p = 0.023$ ). In contrast, OTU evenness was  
positively related to DOM richness ( $r^2 = 0.67$ ,  $p = 0.003$ ) but negatively related to resource  
254 concentration ( $r^2 = 0.49$ ,  $p = 0.022$ ).

Next, we tested for relationships between resources (concentrations and composition) and  
256 bacterial beta-diversity using distance-based redundancy analysis (dbRDA). Based on the  
dbRDA models, resource concentrations explained 28 % of the variation in bacterial community  
258 composition ( $p = 0.002$ ), and DOM composition explained 45 % of the variation in bacterial  
community composition ( $p = 0.03$ , Fig. 3). However, when we partitioned the explained  
260 variation among the DOM PCoA axes, only DOM Axis 2 was significant ( $r^2 = 0.70$ ,  $p = 0.017$ ).  
In addition, this DOM axis was correlated to variation along OTU PCoA Axis 1 ( $\rho = 0.83$ ,  
262  $p = 0.002$ ; Fig. 3). Last, we tested for relationships between resource concentration and DOM  
composition. We found a significant correlation between resource concentration and DOM Axis  
264 2 ( $\rho = 0.69$ ,  $p = 0.03$ ).

266 **Consumer–Resource Specialization** — Based on consumer-resource co-occurrence analysis  
and spatial occurrence, we classified generalist and cosmopolitan bacteria. We found that 1.3%

268 of taxa (68 OTUs) were resource generalists, and 4.5 % (233 OTUs) were cosmopolitan taxa. Of  
the resource generalists, 74 % were also found to be cosmopolitan taxa. Proportionally, resource  
270 generalists and cosmopolitan taxa were substantial across all lakes (Fig. 4). For both groups,  
there was a significant negative relationship between relative abundance and resource  
272 concentration (Fig. 4). In addition, the proportion of resource generalists was related to DOM  
composition based on DOM Axis 2 ( $\rho = 0.81$ ,  $p = 0.004$ ), but not DOM Axis 1 ( $\rho = 0.08$ ,  
274  $p = 0.82$ ). Taxonomically, both resource generalists and cosmopolitan taxa were diverse. For the  
resource generalists, the majority belonged to the classes Alphaproteobacteria (14) and  
276 Planctomycetacia (11), but Verrucomicrobiae (8) and Actinobacteria (7) were also common. At  
the family level, the resource generalists represented groups including Acetobacteraceae,  
278 Caulobacteraceae, Planctomycetaceae, Sphinomonadaceae, and Verrucomicrobiaceae. For the  
cosmopolitan taxa, the majority belonged to the classes Alphaproteobacteria (58) and  
280 Betaproteobacteria (50), but Gammaproteobacteria (14), Actinobacteria (21), Planctomycetacia  
(17), and Sphingobacteria (12) were also common. At the family level, the cosmopolitan taxa  
282 represent groups including Acetobacteraceae, Alcaligenaceae, Burkholderiaceae,  
Caulobacteraceae, Chitinophagaceae, Comomonadaceae, Flavobacteriaceae, Planctomycetaceae,  
284 Rhodobacteraceae, Spartobacteria, Sphinomonadaceae, and Verrucomicrobiaceae.

286

## DISCUSSION

288 We found evidence that resource concentration and resource heterogeneity affect  
bacterial resource–diversity relationships. Our data suggest that there is a significant relationship  
290 between resources (concentration and richness) and bacterial community alpha diversity.

Likewise, resource concentration and composition explained variation in bacterial community  
292 composition (beta-diversity), although to differing degrees. Last, DOM generalists were  
prevalent in the surveyed microbial communities and that there was a negative relationship  
294 between the proportion of generalists and the concentration and composition of DOM. Together,  
our results suggest that DOM resource heterogeneity affects aquatic microbial communities, and  
296 that DOM resources may influence aspects of community diversity (e.g., species evenness) and  
community composition. However, when generalists dominate communities, the effects may be  
298 limited potentially due to complex food-web interactions. Based on our findings, we argue that  
organic matter composition plays an important role in structuring aquatic microbial communities,  
300 and that changes in organic matter composition owing to land use modifications and changing  
terrestrial plant communities may alter the structure and function of aquatic bacterial  
302 communities.

### 304 **Resource Heterogeneity in Microbial Food Webs**

Resource heterogeneity affected the diversity of aquatic bacterial communities. We found that  
306 DOM resources were heterogeneous across lakes — on average lakes were 37 % dissimilar in  
their DOM composition. As such, resource heterogeneity may help explain the variation in  
308 resource-diversity relationships along resource concentration gradients. We tested this hypothesis  
and found that while resource concentration explained 28 % of the variation, DOM resource  
310 composition explained 45 % of the variation in bacterial community composition across lakes.  
These findings suggest that different types of bacteria use and potentially specialize on different  
312 types of resources, which has been observed elsewhere. For example, it has been shown that  
some bacteria primarily use algal-derived resources (Sarmiento and Gasol, 2012; Jaspers and

314 Overmann, 2004) while others primarily use terrestrial-derived resources (Guillemette *et al.*,  
2015; Roehm *et al.*, 2009). Therefore, lakes receiving different resource inputs may be expected  
316 to contain different bacterial communities. Thus, DOM resource heterogeneity is a potential  
mechanism to explain the diversity within and between bacterial communities.

318 Resource diversity (i.e., DOM richness) was positively correlated with OTU evenness,  
but negatively correlated with OTU richness (Fig. 2). Resource diversity is likely to influence  
320 OTU evenness because evenness, a measure of equitability among taxa, may reflect the  
frequency of species traits (Hillebrand *et al.*, 2008; Hill, 1973), such as enzymes needed to  
322 uptake and metabolize different DOM components. Furthermore, changes in evenness have been  
linked to altered species-interactions, coexistence, and ecosystem functions (Hillebrand *et al.*,  
324 2008). If resources represented niches to be partitioned, resource diversity should promote  
species diversity because resource diversity provides unique niches to species to partition  
326 (Werner, 1977; Glasser, 1984; Schoener, 1974). Because we observed an increase in evenness  
but not in richness with greater resource diversity, our findings suggest that the increased  
328 evenness observed in communities represents changes in abundances but not the addition of new  
taxa. Furthermore, the change in evenness — an increase — suggests that the changes in  
330 abundance benefit intermediate rank taxa. Together, our results support the hypothesis that  
resource heterogeneity contributes to observed resource-diversity relationships. In addition, we  
332 propose that DOM resource heterogeneity may promote more diverse communities by increasing  
species equitability and benefiting taxa that comprise the middle ranks of the bacterial  
334 community – “The Microbial Middle Class”.

336

## Resource Substitutability

338 One possible explanation for why resource heterogeneity may only have weak effects in some  
habitats is that many resources are substitutable. Two resources are substitutable when either can  
340 each be used for growth and reproduction while the other is absent (Tilman, 1980). For example,  
some plants are able to grow using ammonium, nitrate, or even organic nitrogen as a source of  
342 nitrogen (Haynes and Goh, 1978; McKane *et al.*, 2002; Schimel and Bennett, 2004), and  
zooplankton such as *Daphnia* can use algae, cyanobacteria, and bacteria independently as food  
344 sources (Demott, 1998). Likewise, aquatic ecosystems contain numerous phosphorus resources  
but some have similar effects on the structure and function of aquatic microbial communities  
346 (Muscarella *et al.*, 2014).

In this study, we found numerous DOM components that appear to have similar  
348 consumer-resource co-occurrence patterns (Fig. S4). One explanation is that many DOM  
components are substitutable. At a chemical level, resources with the same core molecule can be  
350 substitutable. For example, vanillate and ferulate share an internal benzene structure and are used  
by the same metabolic pathways (Buchan *et al.*, 2000). In addition, extracellular enzymes often  
352 degrade aliphatic polymers of different lengths into identical monomers (Rojo, 2009). As such,  
many DOM components are likely substitutable. We used chemical databases to identify the  
354 resources captured by our mass spectrometry and group possible substitutable resource; however,  
we were unable to make positive identifications for many resource components in part due to the  
356 low representation of environmental samples in the available databases. In addition, we tested for  
patterns based on the polarity and molecular weight estimates but found no significant  
358 relationships. This does not mean relationships between DOM and bacterial composition are



indescribable, but methods need to be developed to classify and group DOM components into  
360 meaningful categories based on functional and metabolic forms.

### 362 **Generalist Communities**

Our results suggest that resource generalists may dominate many aquatic microbial communities,  
364 and thus may explain why the effect of resource heterogeneity on community composition is  
stronger in some lakes than others. Specifically, resource heterogeneity had a weak effect on the  
366 composition of bacteria in lakes that separate along OTU PCoA Axis 2 (Fig. 3). Across our  
lakes, we found a negative relationship between the abundance of generalists and the  
368 concentrations of resources. This relationship is also correlated with the second axis of the DOM  
PCoA, but not the first DOM PCoA axis which explains the majority of the DOM variation. One  
370 possibility is that the majority of DOM resources are substitutable. Alternatively, consumers  
could have multiple metabolic pathways for resource acquisition. For example, evidence from  
372 comparative genomics suggests that aquatic bacteria capable of using complex organic matter  
also have the potential to use numerous different resources, and may thus be generalists  
374 (Livermore *et al.*, 2013; Newton *et al.*, 2010; Lauro *et al.*, 2009). As such, we propose that  
resource generalists may be more common in aquatic ecosystems than previously thought  
376 (Mariadassou *et al.*, 2015).

It is often assumed that most bacteria are specialists. For example, multiple studies have  
378 identified taxa that specialize on particular resources (Hunt *et al.*, 2008; Mccarren *et al.*, 2010;  
Gómez-Consarnau *et al.*, 2012; Jaspers and Overmann, 2004; Bird, 2012). The ability to use  
380 multiple resources requires the production of extra enzymes and transporters; therefore, it is  
costly to use numerous resources (Johnson *et al.*, 2012). As such, specialists may be

382 energetically favored in some environments. Likewise, numerous studies have indicated that  
habitat specialists (e.g., sediment and aquatic) dominate bacterial communities (Székely and  
384 Langenheder, 2013; Mariadassou *et al.*, 2015; Langenheder and Ragnarsson, 2007). However,  
our results suggest that generalists are common in the lakes surveyed (Fig. 4). These findings are  
386 supported by another study which found that resource generalists dominated coastal bacterial  
communities (Mou *et al.*, 2008). It should be noted though, that we found both resource  
388 generalists and specialists (Fig. S4) and therefore we are not suggesting that resource specialists  
do not contribute to resource-diversity relationships. Instead, we argue that generalist may limit  
390 the ability of resource heterogeneity to promote diversity when generalists are more dominant  
than specialists.

392 We do acknowledge, however, that the method used to characterize DOM has some  
limitations. First, the DOM extraction and detection may be biased towards some groups of  
394 molecules (Dittmar *et al.*, 2008). While we may have missed some important components of the  
DOM pool, we likely captured the complex terrestrial-derived organic matter that often  
396 dominates aquatic ecosystems (Wilkinson *et al.*, 2013). This DOM has been shown to be  
important for bacterial community structure and function (Lapierre *et al.*, 2013; Lennon and  
398 Pfaff, 2005; Muscarella *et al.*, 2016). However, these are not the only important components of  
the DOM pool, and we may have missed less complex labile molecules that can also affect  
400 bacterial communities (Sarmiento and Gasol, 2012). However, many labile molecules would be  
consumed rapidly, and thus we may not have been able to detect them. Second, our consumer-  
402 resource interaction results are based on a single time point and therefore only suggest possible  
bacteria-resource interactions. We use these correlations to make inferences about the degree to  
404 which taxa are generalists. To make stronger inferences, we would need to conduct time-course

experiments during resource fluctuations and perform experimental manipulations of DOM  
406 concentration and composition. Last, we assume that microbial communities are under local  
selection due to resource availability, but other factors such as dispersal, predation, and the  
408 physical environment can affect community composition. For example, high dispersal rates can  
overwhelm local selection due to mass effects (Leibold *et al.*, 2004) which is especially  
410 important in aquatic microbial communities that receive organisms from the neighboring  
terrestrial landscape (Ruiz-Gonzalez *et al.*, 2015; Crump *et al.*, 2012). Regardless, our results,  
412 and other genomic studies, suggest that resource generalist may dominate aquatic microbial  
communities, and this should be investigated further.

414

### Conclusions

416 Resource heterogeneity influenced the resource-diversity relationship and the  
contribution of heterogeneity can be greater than concentration; however, when resource  
418 generalists dominated communities the resource-diversity relationship was dampened. These  
findings do not mean that there are no specialists in bacterial communities, because we find  
420 evidence of resource specialist and others have found strong evidence for resource and habitat  
specialists (Székely and Langenheder, 2013; Mariadassou *et al.*, 2015; Langenheder and  
422 Ragnarsson, 2007; Bird, 2012; Muscarella *et al.*, 2016). These findings support the hypothesis  
that generalist taxa may limit the affect resource heterogeneity has on local communities;  
424 furthermore, we propose that consumer properties (i.e., generalist) and resource properties (i.e.,  
availability) determine how strong communities respond to resource heterogeneity. In addition,  
426 in order to understand how bacterial communities will respond to environmental changes, such  
as changes in organic matter inputs due to changes in plant community distributions or global

428 climate change, we need to consider which resources are substitutable and which resources will  
change in similar and predictive ways. In doing so, we will be able to understand how microbial  
430 communities will respond to alterations in the available resources.

432

**Acknowledgements:** We acknowledge constructive feedback from AL Peralta and NI Wisnoski.

434 We thank BK Lehmkuhl for technical support and W Thorpe for logistical support. This work  
was supported by the Huron Mountain Wildlife Foundation (MEM, JTL), the National Science  
436 Foundation DEB-1442246 (JTL) & DEB-1501164 (MEM, JTL), and US Army Research Office  
Grant W911NF-14-1-0411 (JTL). All code and data used in this study can be found in a public  
438 GitHub repository (<https://www.github.com/LennonLab/ResourceHeterogeneity>) and the NCBI  
SRA.

440

442 **Conflict of Interest:** The authors declare no conflict of interest

444

## REFERENCES

- 446 Abrams PA, Roth J. (1994). The responses of unstable food chains to enrichment. *Evol Ecol* **8**:  
150–171.
- 448 Alonso-Sáez L, Gasol JM. (2007). Seasonal variations in the contributions of different bacterial  
groups to the uptake of low-molecular-weight compounds in northwestern Mediterranean coastal  
450 waters. *Appl Environ Microbiol* **73**: 3528–35.
- Andersen KM, Turner BL. (2013). Preferences or plasticity in nitrogen acquisition by  
452 understorey palms in a tropical montane forest. *J Ecol* **101**: 819–825.
- Ashton IW, Miller AE, Bowman WD, Suding KN. (2010). Niche complementarity due to  
454 plasticity in resource use: plant partitioning of chemical N forms. *Ecology* **91**: 3252–60.
- Baran R, Brodie EL, Mayberry-Lewis J, Hummel E, Da Rocha UN, Chakraborty R, *et al.* (2015).  
456 Exometabolite niche partitioning among sympatric soil bacteria. *Nat Commun* **6**: 8289.
- Berggren M, Ström L, Laudon H, Karlsson J, Jonsson A, Giesler R, *et al.* (2010). Lake  
458 secondary production fueled by rapid transfer of low molecular weight organic carbon from  
terrestrial sources to aquatic consumers. *Ecol Lett* **13**: 870–80.
- 460 Bird K. (2012). Generalist and specialist strategies of phosphorus acquisition by aquatic bacteria.  
Masters Thesis, Michigan State University, East Lansing, MI.
- 462 Broeckling CD, Afsar FA, Neumann S, Prenni JE. (2014). RAMClust: a Novel feature clustering  
method enables spectral-matching-based annotation for metabolomics data. *Anal Chem* **86**:  
464 6812–6817.
- Broeckling CD, Broz AK, Bergelson J, Manter DK, Vivanco JM. (2008). Root exudates regulate  
466 soil fungal community composition and diversity. *Appl Environ Microbiol* **74**: 738–744.
- Buchan A, Collier LS, Neidle EL. (2000). Key aromatic-ring-cleaving enzyme, protocatechuate

- 468 3,4-dioxygenase, in the ecologically important marine *Roseobacter* lineage. *Appl Environ*  
*Microbiol* **66**: 4662–4672.
- 470 Caporaso JG, Lauber CL, Walters WA, Berg-Lyons D, Huntley J, Fierer N, *et al.* (2012). Ultra-  
high-throughput microbial community analysis on the Illumina HiSeq and MiSeq platforms.  
472 *ISME J* **6**: 1621–1624.
- Carpenter SR, Cole JJ, Hodgson JR, Kitchell JF, Pace ML, Bade DL, *et al.* (2001). Trophic  
474 cascades, nutrients, and lake productivity: whole-lake experiments. *Ecol Monographs* **71**: 163–  
186.
- 476 Cherif M, Loreau M. (2007). Stoichiometric constraints on resource use, competitive  
interactions, and elemental cycling in microbial decomposers. *Am Nat* **169**: 709–724.
- 478 Cory RM, McKnight DM. (2005). Fluorescence spectroscopy reveals ubiquitous presence of  
oxidized and reduced quinones in dissolved organic matter. *Environ Sci Technol* **39**: 8142–9.
- 480 Croué J-P. (2004). Isolation of humic and non-humic NOM fractions: structural characterization.  
*Environ Monit Assess* **92**: 193–207.
- 482 Crump BC, Amaral-Zettler LA, Kling GW. (2012). Microbial diversity in arctic freshwaters is  
structured by inoculation of microbes from soils. *ISME J* **6**: 1629–39.
- 484 Demott WR. (1998). Utilization of a cyanobacterium and a phosphorus-deficient green alga as  
complementary resources by daphnids. *Ecology* **79**: 2463–2481.
- 486 Dittmar T, Koch B, Hertkorn N, Kattner G. (2008). A simple and efficient method for the solid-  
phase extraction of dissolved organic matter (SPE-DOM) from seawater. *Limnol Oceanogr*  
488 *Methods* **6**: 230–235.
- Fellman JB, Miller MP, Cory RM, D'Amore D V, White D. (2009). Characterizing dissolved  
490 organic matter using PARAFAC modeling of fluorescence spectroscopy: a comparison of two

- models. *Environ Sci Technol* **43**: 6228–34.
- 492 Finke DL, Snyder WE. (2008). Niche partitioning increases resource exploitation by diverse  
communities. *Science* (80- ) **321**: 1488–1490.
- 494 Glasser JWJ. (1984). Evolution of efficiencies and strategies of resource exploitation. *Ecology*  
**65**: 1570–1578.
- 496 Gómez-Consarnau L, Lindh M V, Gasol JM, Pinhassi J. (2012). Structuring of bacterioplankton  
communities by specific dissolved organic carbon compounds. *Environ Microbiol* **14**: 2361–  
498 2378.
- Gotelli NJ. (2000). Null model analysis of species co-occurrence patterns. *Ecology* **81**: 2606.
- 500 Guillemette F, McCallister SL, del Giorgio PA. (2015). Selective consumption and metabolic  
allocation of terrestrial and algal carbon determine allochthony in lakes. *ISME J*.
- 502 Hairston NGJ, Hairston NG. (1993). Cause-effect relationships in energy-flow, trophic structure,  
and interspecific interactions. *Am Nat* **142**: 379–411.
- 504 Haynes RJ, Goh KM. (1978). Ammonium and nitrate nutrition of plants. *Biol Rev* **53**: 465–510.
- Hill MO. (1973). Diversity and evenness: a unifying notation and its consequences. *Ecology* **54**:  
506 427–432.
- Hillebrand H, Bennett DM, Cadotte MW. (2008). Consequences of dominance: a review of  
508 evenness effects on local and regional ecosystem processes. *Ecology* **89**: 2712–2724.
- Holt RD, Grover JP, Tilman D. (1994). Simple Rules for Interspecific Dominance in Systems  
510 with Exploitative and Apparent Competition. *Am Nat* **144**: 741–771.
- Hughes JB, Hellmann JJ. (2005). The application of rarefaction techniques to molecular  
512 inventories of microbial diversity. *Methods Enzymol* **397**: 292–308.
- Hulot FD, Lacroix G, Lescher-Moutou\`e, Loreau M. (2000). Functional diversity governs

- 514 ecosystem response to nutrient enrichment. *Nature* **405**: 340–344.
- Hunt DE, David LA, Gevers D, Preheim SP, Alm EJ, Polz MF. (2008). Resource partitioning  
516 and sympatric differentiation among closely related bacterioplankton. *Science (80- )* **320**: 1081–  
1085.
- 518 James FC, Rathbun S. (1981). Rarefaction, relative abundance, and diversity of avian  
communities. *Auk* **98**: 785–800.
- 520 Jaspers E, Overmann J. (2004). Ecological significance of microdiversity: identical 16S rRNA  
gene sequences can be found in bacteria with highly divergent genomes and ecophysologies.  
522 *Appl Environmantal Microbiol* **70**: 4831–4839.
- Johnson DR, Goldschmidt F, Lilja EE, Ackermann M. (2012). Metabolic specialization and the  
524 assembly of microbial communities. *ISME J* **6**: 1985–1991.
- Lachat. (2005). Standard Operating Procedure for Total and Total Dissolved Phosphorous  
526 (Lachat Method 10-115-01-1-F for QuikChem FIA + 8000).
- Langenheder S, Ragnarsson H. (2007). The role of environmental and spatial factors for the  
528 composition of aquatic bacterial communities. *Ecology* **88**: 2154–2161.
- Lapierre J-F, Guillemette F, Berggren M, Del Giorgio PA. (2013). Increases in terrestrially  
530 derived carbon stimulate organic carbon processing and CO<sub>2</sub> emissions in boreal aquatic  
ecosystems. *Nat Commun* **4**: 2972.
- 532 Lauro FM, McDougald D, Thomas T, Williams TJ, Egan S, Rice S, *et al.* (2009). The genomic  
basis of trophic strategy in marine bacteria. *Proc Natl Acad Sci* **106**: 15527–15533.
- 534 Legendre P, Anderson MJ. (1999). Distance-based redundancy analysis: testing multispecies  
responses in multifactorial ecological experiments. *Ecol Monogr* **69**: 1–24.
- 536 Legendre P, Legendre LFJ. (2012). Numerical Ecology. Elsevier.



- Leibold MA. (1999). Biodiversity and nutrient enrichment in pond plankton communities. *Evol*  
538 *Ecol Res* **1**: 73–95.
- Leibold MA, Chase JM, Shurin, and JB, Downing AL. (1997). Species Turnover and the  
540 Regulation of Trophic Structure. *Annu Rev Ecol Syst* **28**: 467–494.
- Leibold MA, Holyoak M, Mouquet N, Amarasekare P, Chase JM, Hoopes MF, *et al.* (2004). The  
542 metacommunity concept: a framework for multi-scale community ecology. *Ecol Lett* **7**: 601–613.
- Lennon JT, Pfaff LE. (2005). Source and supply of terrestrial organic matter affects aquatic  
544 microbial metabolism. *Aquat Microb Ecol* **39**: 107–119.
- Levine JM, HilleRisLambers J. (2009). The importance of niches for the maintenance of species  
546 diversity. *Nature* **461**: 254–7.
- Livermore JA, Emrich SJ, Tan J, Jones SE. (2013). Freshwater bacterial lifestyles inferred from  
548 comparative genomics. *Environ Microbiol.* e-pub ahead of print, doi: 10.1111/1462-2920.12199.
- Mariadassou M, Pichon S, Ebert D. (2015). Microbial ecosystems are dominated by specialist  
550 taxa. *Ecol Lett* **18**: 974–982.
- Mccarren J, Becker JW, Repeta DJ, Shi Y, Young CR, Malmstrom RR, *et al.* (2010). Microbial  
552 community transcriptomes reveal microbes and metabolic pathways associated with dissolved  
organic matter turnover in the sea. *Proc Natl Acad Sci* **107**: 16420–16427.
- 554 McKane RB, Johnson LC, Shaver GR, Nadelhoffer KJ, Rastetter EB, Fry B, *et al.* (2002).  
Resource-based niches provide a basis for plant species diversity and dominance in arctic tundra.  
556 *Nature* **415**: 68–71.
- Mittelbach GG, Steiner CF, Scheiner SM, Gross KL, Reynolds HL, Waide RB, *et al.* (2001).  
558 What is the observed relationship between species richness and productivity? *Ecology* **82**: 2381–  
2396.

- 560 Moran MA, Kujawinski EB, Stubbins A, Fatland R, Aluwihare LI, Buchan A, *et al.* (2016).  
Deciphering ocean carbon in a changing world. *Proc Natl Acad Sci* **113**: 3143–3151.
- 562 Mou X, Sun S, Edwards RA, Hodson RE, Moran MA. (2008). Bacterial carbon processing by  
generalist species in the coastal ocean. *Nature* **451**: 708–11.
- 564 Muscarella ME, Bird K, Larsen ML, Placella SA, Lennon JT. (2014). Phosphorus resource  
heterogeneity in microbial food webs. *Aquat Microb Ecol* **73**: 259–272.
- 566 Muscarella ME, Jones SE, Lennon JT. (2016). Species sorting along a subsidy gradient alters  
bacterial community stability. *Ecology*.
- 568 Neter J, Kutner MH, Nachtsheim CJ, Wasserman W. (1996). Applied linear statistical models.  
Irwin: Chicago, Illinois, USA.
- 570 Newton RJ, Griffin LE, Bowles KM, Meile C, Gifford S, Givens CE, *et al.* (2010). Genome  
characteristics of a generalist marine bacterial lineage. *ISME J* **4**: 784–798.
- 572 Oksanen J, Blanchet FG, Kindt R, Legendre P, Minchin PR, O’Hara RB, *et al.* (2013). Vegan:  
community ecology package. <http://cran.r-project.org/package=vegan>.
- 574 Osterholz H, Kirchman DL, Niggemann J, Dittmar T. (2018). Diversity of bacterial communities  
and dissolved organic matter in a temperate estuary. *FEMS Microbiol Ecol* **94**. e-pub ahead of  
576 print, doi: 10.1093/femsec/fiy119.
- Petras D, Koester I, Da Silva R, Stephens BM, Haas AF, Nelson CE, *et al.* (2017). High-  
578 Resolution Liquid Chromatography Tandem Mass Spectrometry Enables Large Scale Molecular  
Characterization of Dissolved Organic Matter. *Front Mar Sci* **4**. e-pub ahead of print, doi:  
580 10.3389/fmars.2017.00405.
- Polis GA, Strong DR. (1996). Food web complexity and community dynamics. *Am Nat* **147**:  
582 813–846.

- R Core Team. (2012). R: A language and environment for statistical computing. <http://www.r-project.org/>.
- 584
- Roehm CL, Giesler R, Karlsson J. (2009). Bioavailability of terrestrial organic carbon to lake  
586 bacteria: the case of a degrading subarctic permafrost mire complex. *J Geophys Res* **114**:  
G03006.
- 588 Rognes T, Flouri T, Nichols B, Quince C, Mahé F. (2016). VSEARCH: a versatile open source  
tool for metagenomics. *PeerJ* **4**: e2584.
- 590 Rojo F. (2009). Degradation of alkanes by bacteria: Minireview. *Environ Microbiol* **11**: 2477–  
2490.
- 592 Rosenzweig ML. (1971). Paradox of enrichment: destabilization of exploitation ecosystems in  
ecological time. *Science (80- )* **171**: 385–387.
- 594 Ruiz-Gonzalez C, Nino-Garcia JP, del Giorgio PA. (2015). Terrestrial origin of bacterial  
communities in complex boreal freshwater networks. *Ecol Lett* **18**: 1198–1206.
- 596 Sarmiento H, Gasol JM. (2012). Use of phytoplankton-derived dissolved organic carbon by  
different types of bacterioplankton. *Environ Microbiol* **14**: 2348–2360.
- 598 Schaetzl RJ, Enander H, Luehmann MD, Lusch DP, Fish C, Bigsby M, *et al.* (2013). Mapping  
the physiography of Michigan with GIS. *Phys Geogr* **34**: 2–39.
- 600 Schimel JP, Bennett J. (2004). NITROGEN MINERALIZATION: CHALLENGES OF A  
CHANGING PARADIGM. *Ecology* **85**: 591–602.
- 602 Schloss PD, Westcott SL, Ryabin T, Hall JR, Hartmann M, Hollister EB, *et al.* (2009).  
Introducing mothur: open-source, platform-independent, community-supported software for  
604 describing and comparing microbial communities. *Appl Environ Microbiol* **75**: 7537–7541.
- Schoener TW. (1974). Resource partitioning in ecological communities. *Science (80- )* **185**: 27–

606 39.

Smith B, Wilson JB. (1996). A consumer's guide to evenness indices. *Oikos* **76**: 70–82.

608 Smith CA, Tautenhahn R, Neumann S, Benton P, Conley C, Rainer J. (2016). xcms: LC/MS and  
GC/MS data analysis package.

610 Stevens MH, Carson WP. (2002). Resource quantity, not resource heterogeneity, maintains plant  
diversity. *Ecol Lett* **5**: 420–426.

612 Stevenson FJ. (1994). Humus chemistry: genesis, composition, reactions. 2nd ed. John Wiley &  
Sons, Inc.: New York, NY.

614 Stomp M, Huisman J, de Jongh F, Veraart AJ, Gerla D, Rijkeboer M, *et al.* (2004). Adaptive  
divergence in pigment composition promotes phytoplankton biodiversity. *Nature* **432**: 104–107.

616 Székely AJ, Langenheder S. (2013). The importance of species sorting differs between habitat  
generalists and specialists in bacterial communities. *FEMS Microbiol Ecol.* e-pub ahead of print,  
618 doi: 10.1111/1574-6941.12195.

Tilman D. (1980). Resources: a graphical-mechanistic approach to competition and predation.

620 *Am Nat* **116**: 362–393.

Tilman D, Kilham SS, Kilham P. (1982). Phytoplankton community ecology: the role of limiting  
622 nutrients. *Annu Rev Ecol Syst* **13**: 349–372.

Töpper B, Thingstad TF, Sandaa R-A. (2012). Effects of differences in organic supply on

624 bacterial diversity subject to viral lysis. *FEMS Microbiol Ecol.* e-pub ahead of print, doi:  
10.1111/j.1574-6941.2012.01463.x.

626 Turner BL. (2008). Resource partitioning for soil phosphorus: a hypothesis. *J Ecol* **96**: 698–702.

Waldrop MP, Zak DR, Blackwood CB, Curtis CD, Tilman D. (2006). Resource availability

628 controls fungal diversity across a plant diversity gradient. *Ecol Lett* **9**: 1127–1135.

- Weishaar JL, Aiken GR, Bergamaschi B a., Fram MS, Fujii R, Mopper K. (2003). Evaluation of  
630 Specific Ultraviolet Absorbance as an Indicator of the Chemical Composition and Reactivity of  
Dissolved Organic Carbon. *Environ Sci Technol* **37**: 4702–4708.
- 632 Werner EE. (1977). Species packing and niche complementarity in three sunfishes. *Am Nat* **111**:  
553–578.
- 634 Wetzel RG, Likens GE. (2000). Inorganic nutrients: nitrogen, phosphorus, and other nutrients.  
In: *Limnological Analyses*. Springer-Verlag: New York, pp 85–111.
- 636 Wilkinson GM, Pace ML, Cole JJ. (2013). Terrestrial dominance of organic matter in north  
temperate lakes. *Global Biogeochem Cycles* **27**: 43–51.
- 638 Williams RJ, Howe A, Hofmockel KS. (2014). Demonstrating microbial co-occurrence pattern  
analyses within and between ecosystems. *Front Microbiol* **5**: 1–10.
- 640 Woods KD. (2000). Dynamics in late-successional hemlock-hardwood forests over three  
decades. *Ecology* **81**: 110–126.
- 642 Worm B, Lotze HK, Hillebrand H, Sommer U. (2002). Consumer versus resource control of  
species diversity and ecosystem functioning. *Nature* **417**: 848–851.
- 644
- 646

## TABLES

648

650

652

**Table 1.** Lake Properties and Chemistry – Latitude, longitude and surface area (hectares), pH, temperature (Temp.), dissolved oxygen concentration (DO), chlorophyll *a* concentration (Chl *a*), TN: total nitrogen, TP: total phosphorus, DOC: dissolved organic carbon.

| Lake        | Latitude | Longitude | Area (ha) | pH   | Temp (°C) | DO (mg L <sup>-1</sup> ) | Chl <i>a</i> (µg L <sup>-1</sup> ) |
|-------------|----------|-----------|-----------|------|-----------|--------------------------|------------------------------------|
| Ann         | 46.8715  | 87.9220   | 25        | 7.86 | 27.44     | 7.22                     | 1.25                               |
| Canyon      | 46.8334  | 87.9224   | 1.1       | 7.02 | 23.9      | 7.24                     | 1.63                               |
| Howe        | 46.8916  | 87.9470   | 69        | 7.78 | 26.4      | 7.22                     | 1.85                               |
| Ives        | 46.8440  | 87.8483   | 191       | 8.10 | 25.4      | 7.62                     | 1.39                               |
| Lily        | 46.8475  | 87.8302   | 1.6       | 5.51 | 26.2      | 5.7                      | 3.55                               |
| Mountain    | 46.8692  | 87.9063   | 338       | 8.31 | 26.5      | 7.93                     | 2.14                               |
| Pony        | 46.8874  | 87.9175   | 0.5       | 5.39 | 25.3      | 7.04                     | 16.35                              |
| Rush        | 46.8882  | 87.9067   | 127       | 8.14 | 25.7      | 7.74                     | 1.23                               |
| Second Pine | 46.8682  | 87.8572   | 69        | 8.09 | 26.2      | 7.17                     | 3.76                               |
| Upper Pine  | 46.8624  | 87.8502   | 16        | 7.79 | 26.6      | 7.12                     | 8.55                               |

654

656 **Table 1 Cont.** Lake Chemistry. TN: total nitrogen, TP: total phosphorus, DOC: dissolved  
658 organic carbon.

| Lake        | DOC (mg C L <sup>-1</sup> ) | TP (µg P L <sup>-1</sup> ) | TN (mg N L <sup>-1</sup> ) |
|-------------|-----------------------------|----------------------------|----------------------------|
| Ann         | 5.97                        | 7.27                       | 0.43                       |
| Canyon      | 7.23                        | 2.64                       | 0.38                       |
| Howe        | 7.04                        | 5.21                       | 0.57                       |
| Ives        | 6.91                        | 9.15                       | 0.38                       |
| Lily        | 14.35                       | 11.55                      | 0.93                       |
| Mountain    | 5.27                        | 5.87                       | 0.34                       |
| Pony        | 28.99                       | 17.04                      | 1.86                       |
| Rush        | 4.22                        | 3.84                       | 0.41                       |
| Second Pine | 6.26                        | 12.92                      | 0.44                       |
| Upper Pine  | 7.84                        | 11.21                      | 0.57                       |

660

## FIGURE LEGENDS

662

**Fig. 1:** Principal coordinates analysis (PCoA) ordination of dissolved organic matter (DOM).

664

The distances between symbols represent the dissimilarity between DOM in each lake. Using three axes, we can explain 71% of the variation in DOM composition. The third axis (not shown)

666

captures 14% of the variation. Symbol sizes reflect variation in the concentration of dissolved organic carbon (DOC). Vectors represent the correlations between DOM composition and

668

various physical and chemical attributes of each lake including: pH, area, DOC, total nitrogen (TN), total phosphorus (TP), and chlorophyll a (Chl).

670

**Fig. 2:** Bacterial community diversity relationships with resource concentration and resource

672

richness. Resource (DOC) concentration and species richness have been Box-Cox transformed to meet model assumptions. There are significant positive relationships between species richness

674

and resource concentration and between species evenness and dissolved organic matter (DOM) richness. There are significant negative relationships between species evenness and resource

676

concentration and between species richness and DOM richness. Dashed line represents linear regression fit along with 95% confidence intervals.

678

**Fig. 3:** Principal coordinates analysis (PCoA) ordination of bacterial communities. Vectors

680

represent the correlation between the dissolved organic matter (DOM) heterogeneity and the bacterial community composition. The two vectors are based on correlations between community

682

composition and the site scores from the DOM PCoA axes one and two. We used distance-based redundancy analysis to test the relationship between DOM site scores and bacterial community

684

composition.



686 **Fig. 4:** The proportion of generalists and cosmopolitan taxa in aquatic bacterial communities. We  
defined operational taxonomic units (OTUs) as generalists using consumer-resource co-  
688 occurrence (top) and as cosmopolitan based on spatial occurrence (top). We used OTU relative  
abundances to calculate the proportion in each community. For both, we used a linear model to  
690 determine if there was a relationship between the proportion of generalists and the concentration  
of dissolved organic carbon (DOC). For both, we found a significant negative relationship.  
692 Dashed line represents linear regression fit along with 95% confidence intervals. The light gray  
dotted line represents 50% of the community and is used as a reference.  
694

## FIGURES

696

698 **Figure 1:**

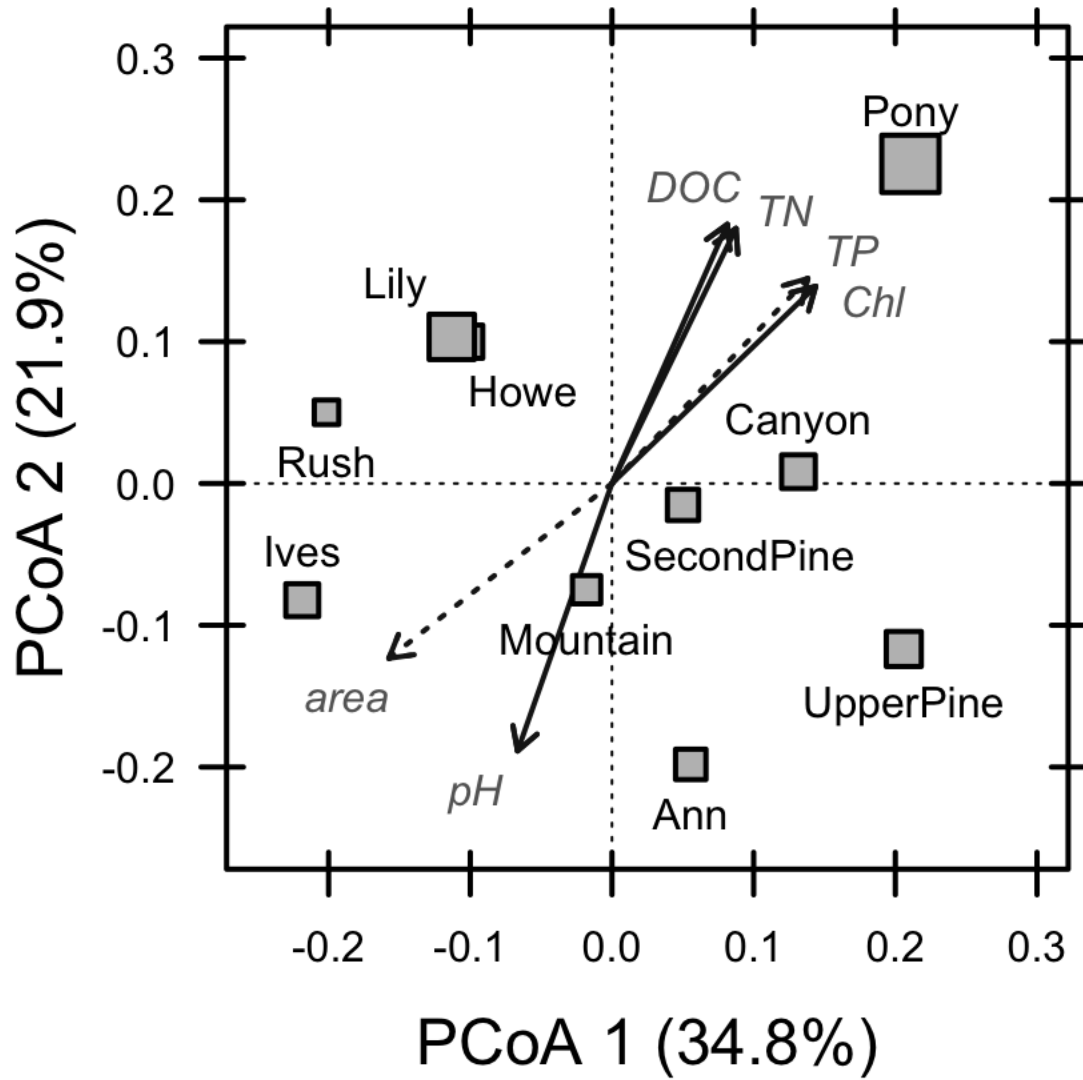

700

702 **Figure 2:**

704

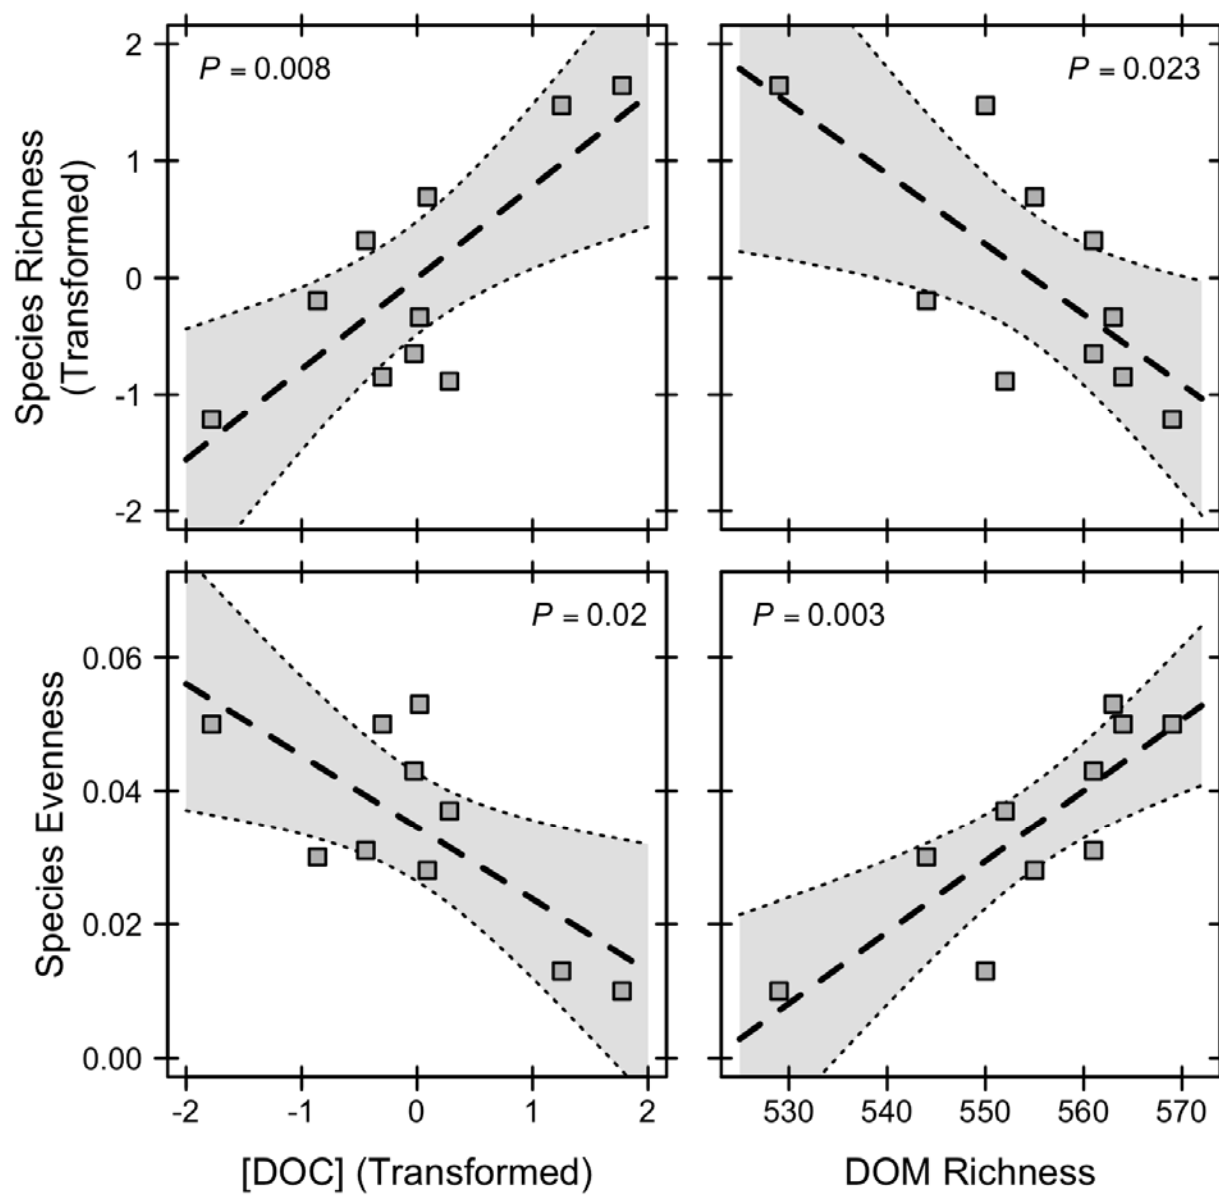

706

Figure 3:

708

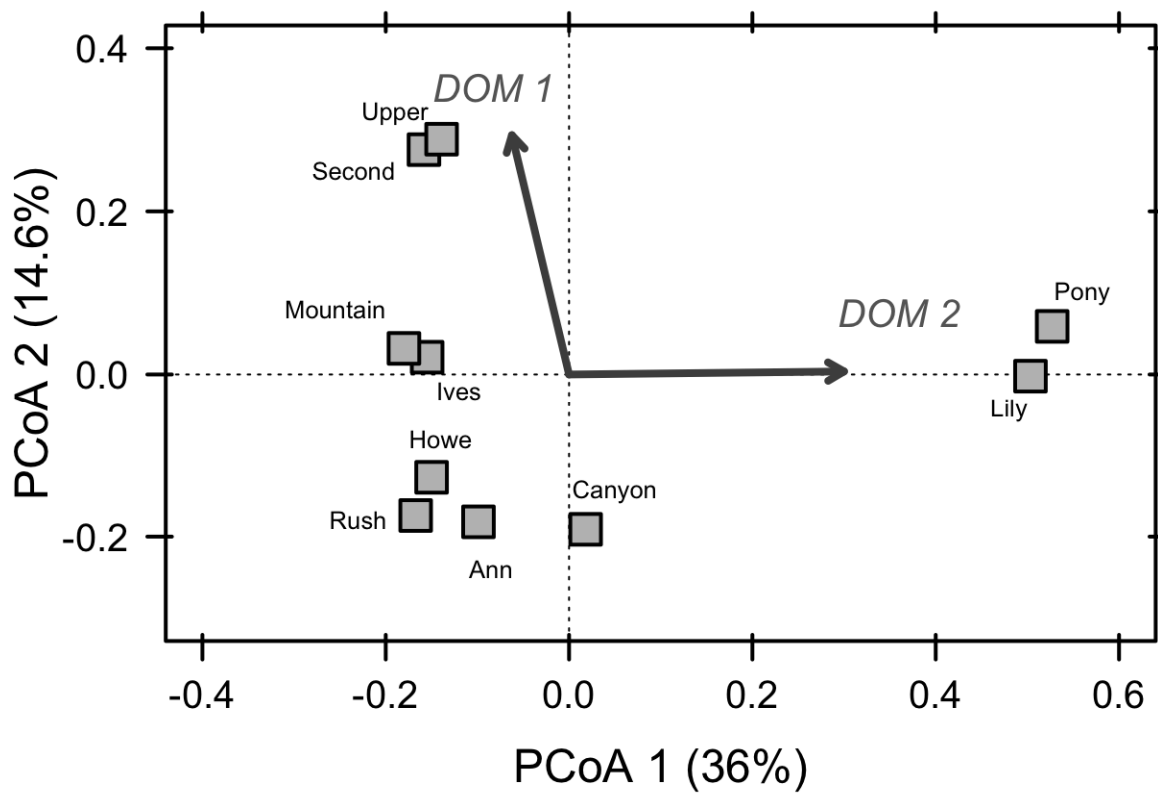

710

712

**Figure 4:**

714

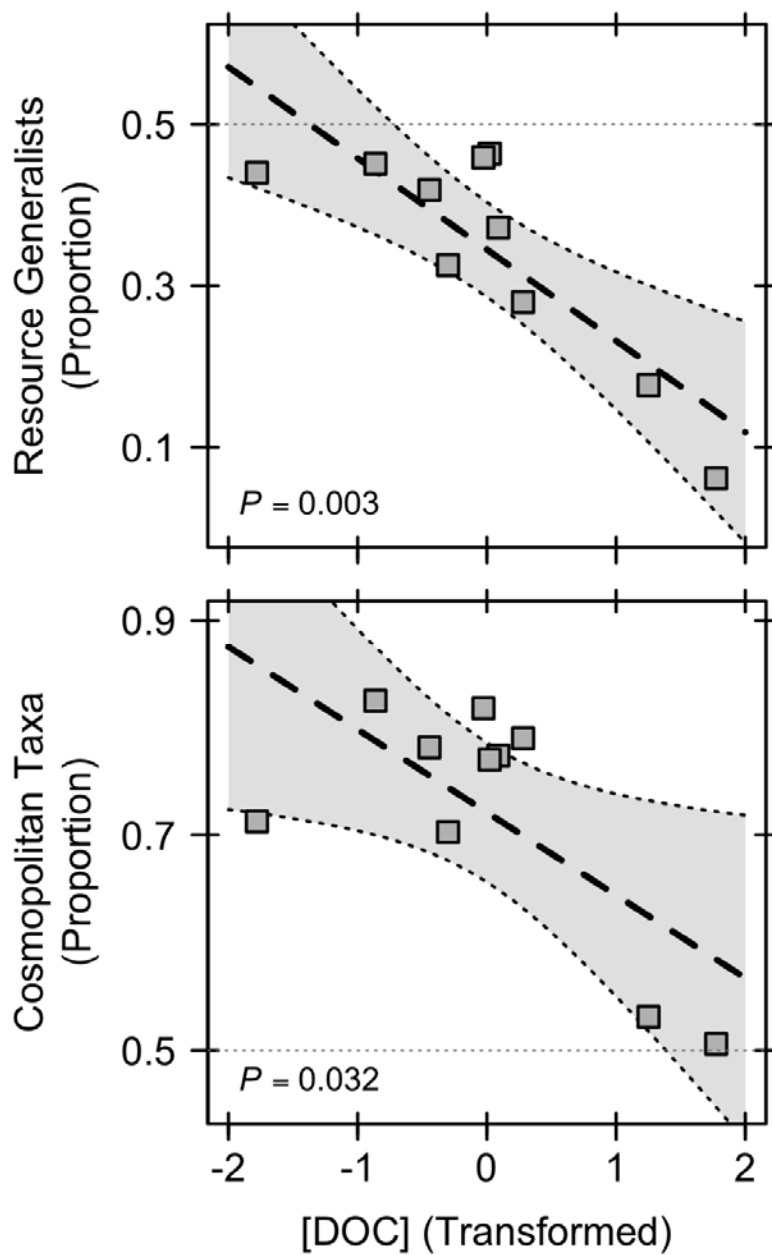

Source: https://www.biorxiv.org/content/10.1101/387803v1.full.pdf
